# Supplementary material for: TrkB agonist antibody ameliorates fertility deficits in aged and cyclophosphamide-induced premature ovarian failure model mice
Source: PubMed Central journal article supplement (PMC8854395; doi:10.1038/s41467-022-28611-2), 2022-02-17
Supplement: 41467_2022_28611_MOESM1_ESM.pdf [file 41467_2022_28611_MOESM1_ESM.pdf]

1  
2  
3  
4  
5  
6

**Supplementary information for:**  
TrkB agonist antibody ameliorates fertility deficits in aged and cyclophosphamide-  
induced premature ovarian failure model mice

Qin et al.

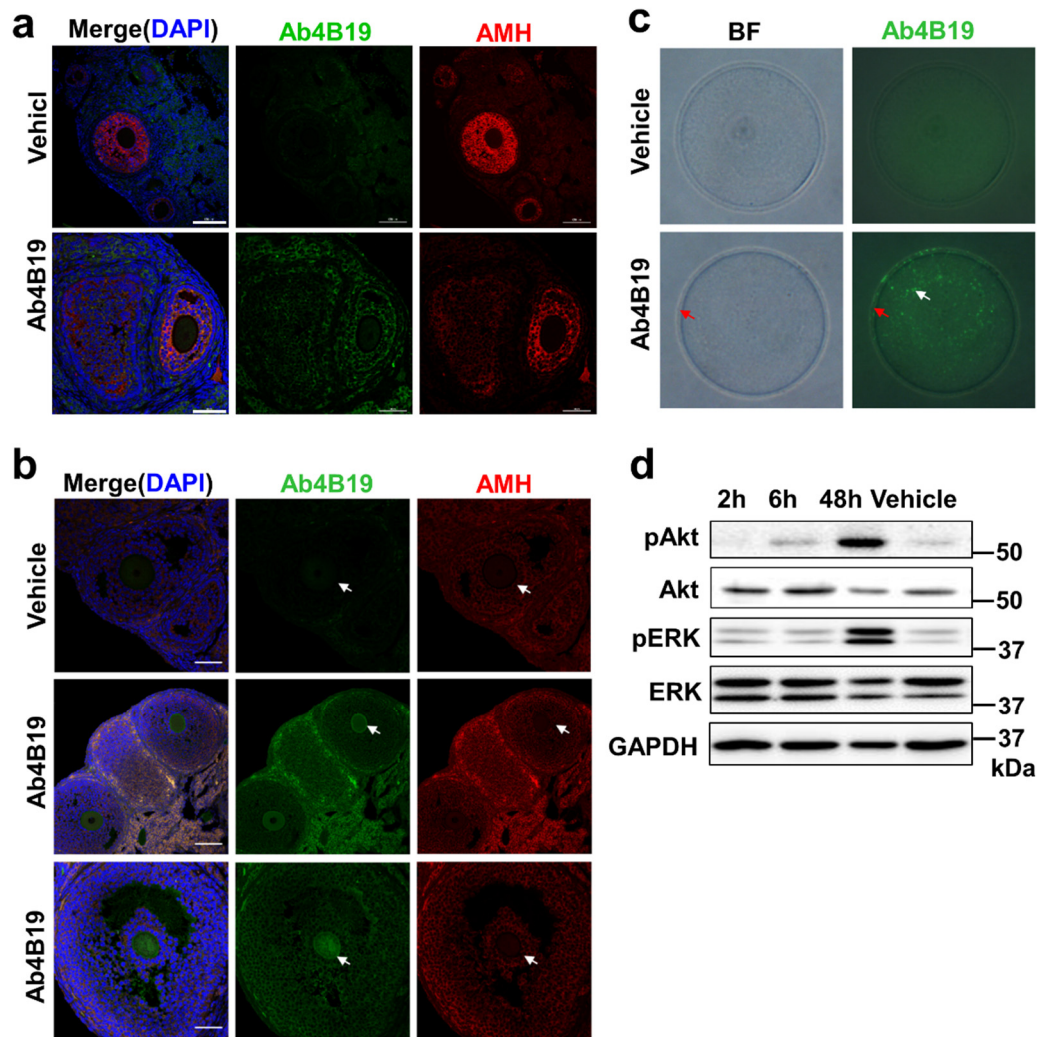

7

8 **Supplementary Fig. 1 Detection of Ab4B19 in follicles after its iv administration.** The rabbit  
 9 antibody Ab4B19 was detected with anti-rabbit IgG (FITC, green); AMH was probed with mouse  
 10 anti-AMH and detected with anti-mouse IgG (TRITC, red). Cell nucleus were labeled with DAPI  
 11 (blue). **a** Immunostaining images showing Ab4B19 penetration into follicles 24 hours (24h) after  
 12 tail-vein injection. Scale bar, 100  $\mu$ m. **b** Representative images depicting the enrichment of Ab4B19  
 13 around oocytes 48 hours (48h) after its administration. White arrowheads point to the localization  
 14 of Ab4B19 on an oocyte in ovarian follicle. Scale bar, 200  $\mu$ m. Experiments were repeated 3 times  
 15 independently with similar results (4 sections/mice each time). **c** Representative images of oocytes  
 16 treated with Ab4B19 cultured for 12 hours. Ab4B19 was detected with anti-rabbit IgG (FITC,  
 17 green). BF: bright field. White arrow indicates the presence of Ab4B19 in oocyte cytoplasm. Red  
 18 arrow indicates zona pellucida. Experiments were repeated 3 times independently with similar  
 19 results. **d** Time course of TrkB activation in ovary after Ab4B19 administration (1 mg/kg; iv) into  
 20 8-week-old mice. Ovary tissues were collected and lysed at different time points after tail vein  
 21 injection of Ab4B19, and Western blots were performed to detect pAkt and pERK. Experiments  
 22 were repeated at least two times with similar results. Source data are provided as a Source Data file.

23

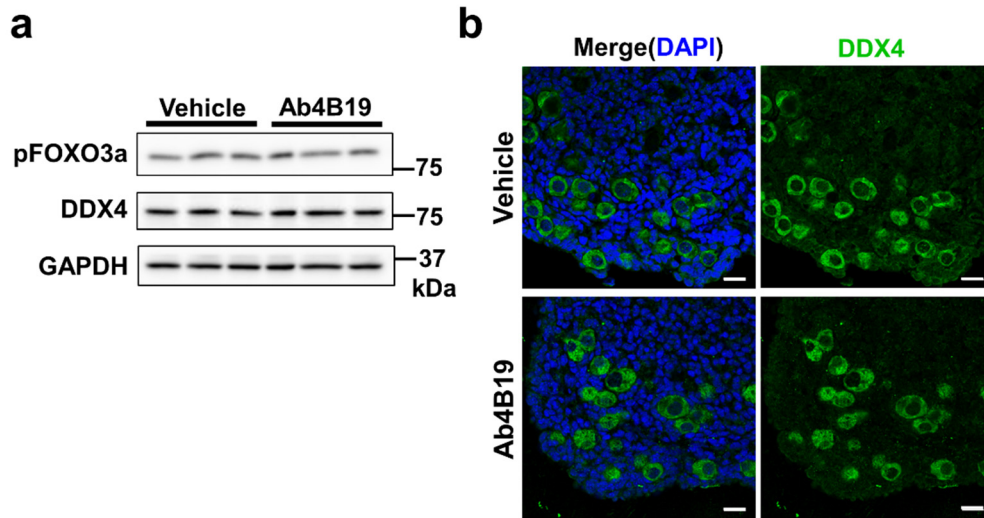

24

25 **Supplementary Fig. 2 Effect of Ab4B19 on primordial follicles.** **a** Representative Western blot of  
 26 pFOXO3a and DDX4 expression in cultured P3 ovaries after administration with Ab4B19 for 48  
 27 hours. **b** Immunofluorescence staining showing the expression DDX4 for experiment of (**a**). (Green:  
 28 DDX4, Blue: DAPI). Scale bars, 20  $\mu$ m. The experiment was repeated three times. Source data are  
 29 provided as a Source Data file.

30

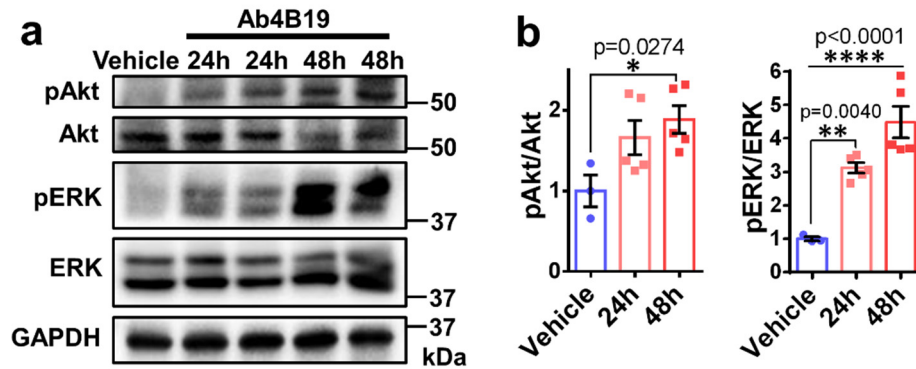

32

33 **Supplementary Fig. 3 Activation of TrkB signaling pathways in NA-POF model. a**  
 34 Phosphorylated and total Akt, Erk were measured by Western blotting with GAPDH used as a  
 35 loading control, at 24 hours and 48 hours after Ab4B19 treatment. **b** The ratios of  
 36 phosphorylated/total proteins were calculated and plotted. A total of 13 mice were used, with tissues  
 37 from 5 mice for each time point and 3 mice for Vehicle. Data are presented as mean  $\pm$  SEM.  
 38 Statistical analyses were carried out using one-way ANOVA followed by the Dunnett's multiple  
 39 comparisons test. (\*P < 0.05; \*\*P < 0.01; \*\*\*\*P < 0.0001). Source data are provided as a Source  
 40 Data file.

41

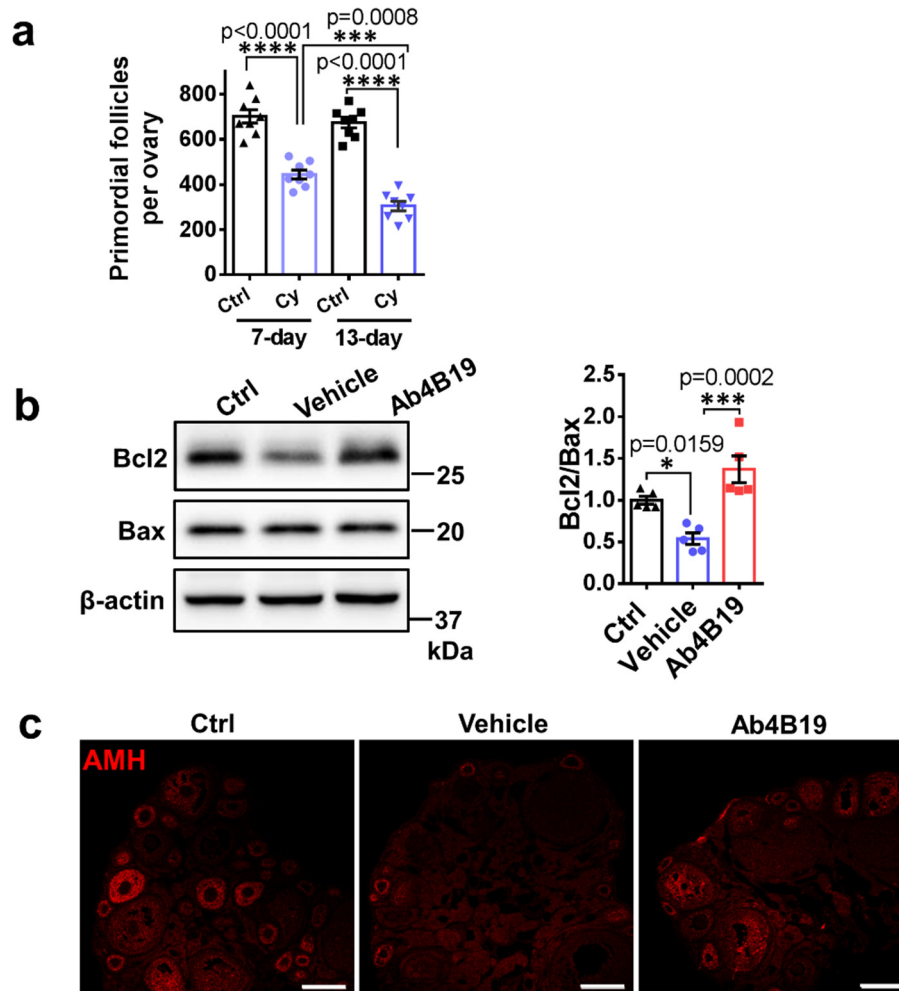

42

43 **Supplementary Fig. 4 Reversal of gonadotoxicity and AMH expression by Ab4B19 in Cy-POF**  
 44 **model. a** Quantification of primordial follicles in normal mice (Ctrl) and Cy-POF mice. Mice were  
 45 treated with vehicle or 75mg/kg Cy through intraperitoneal injection. Ovaries were collected for  
 46 immunostaining 7 or 13 days after Cy treatment. N = 8 ovaries per each condition. **b** Inhibition of  
 47 apoptosis by Ab4B19 in Cy-POF mice. Cy-POF mice were treated with Ab4B19 as shown in Fig.  
 48 6a. The lysates of ovarian tissues were collected and processed for Western blotting to detect the  
 49 expression of Bcl2 and Bax. The blots were quantified and relative intensities of Bcl2/Bax are  
 50 shown in the left panel. N = 5 mice per group. Data are presented as mean  $\pm$  SEM. Statistical  
 51 analyses were carried out using one-way ANOVA, followed by Dunnett's multiple comparisons test  
 52 (**a, b**). (\*P < 0.05; \*\*P < 0.01; \*\*\*P < 0.001; \*\*\*\*P < 0.0001). Source data are provided as a Source  
 53 Data file. **c** Immunofluorescent images showing the expression of AMH in ovaries in normal (Ctrl),  
 54 and Cy-POF mice treated with vehicle or Ab4B19 for 6 days. Scale bars, 200  $\mu$ m. Experiments  
 55 were repeated at least 3 times independently with similar results (4 sections/mice each  
 56 time).

57

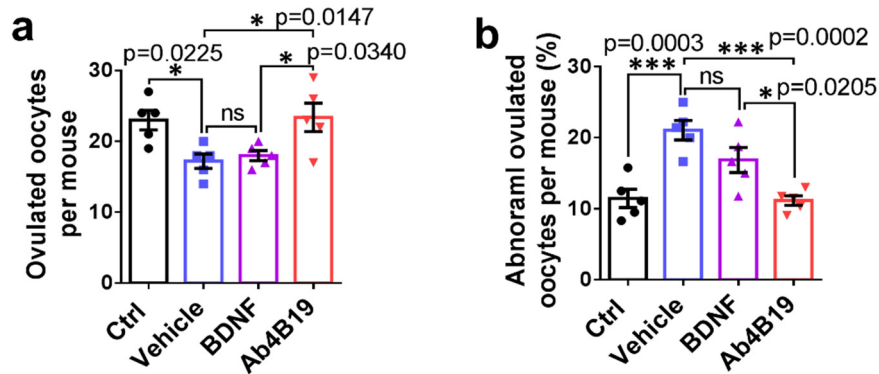

59

60

61 **Supplementary Fig. 5 a-b Quantification of ovulated oocytes and abnormal oocytes in Cy-**  
 62 **POF mice treated with BDNF or Ab4B19.** With the non-Cy treated mice as Ctrl, Cy-POF mice  
 63 were treated with normal IgG (Vehicle), BDNF (0.17 mg/kg/2d) and Ab4B19 (1 mg/kg/3d) mice  
 64 for 6 days. The number of ovulated oocytes (left) and the ratio of abnormal oocytes/total ovulated  
 65 oocytes (right) were quantified (N = 5 mice per group). Note: 0.17 mg/kg BDNF (MW: ~25kD) is  
 66 same as 1 mg/kg Ab4B19 (MW: ~150KD) in molar unit. Data are presented as mean ± SEM.  
 67 Statistical analyses were carried out using one-way ANOVA followed by the Dunnett's multiple  
 68 comparisons test. (\*P < 0.05; \*\*P < 0.01; \*\*\*P < 0.001). Source data are provided as a Source Data  
 69 file.

70

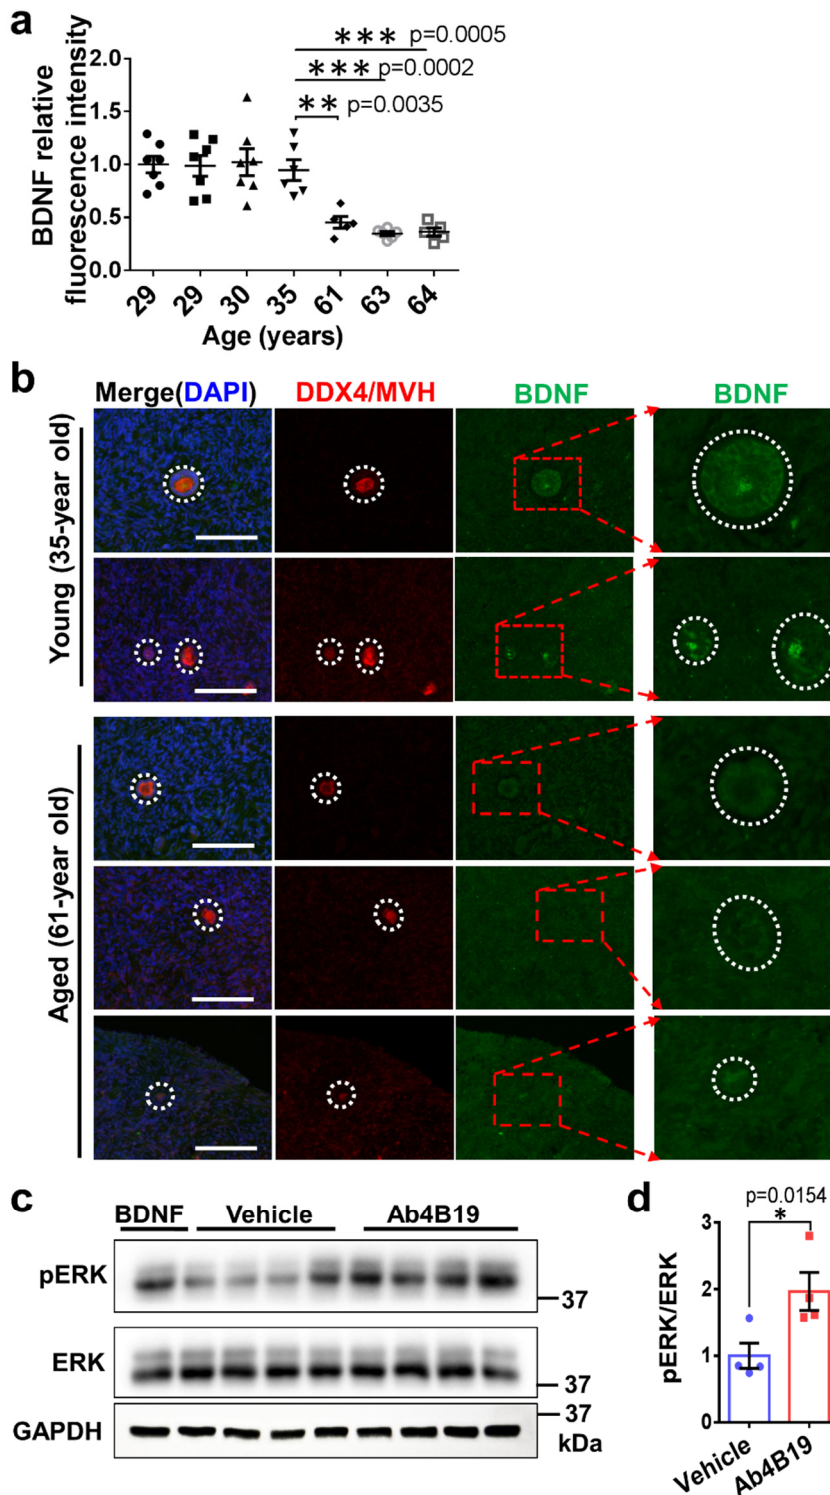

71

72 **Supplementary Fig. 6 a** BDNF expression in human ovary at different ages.  $n = 7$  ovarian follicles  
 73 in 29-year and 30-year old groups, 6 in 35-year and 63-year old groups, and 5 in 61-year and 64-  
 74 year old groups. BDNF-immunoreactivity (relative fluorescence intensity) of ovarian paraffin  
 75 sections derived from 29-73 years old women was detected by a rabbit anti-BDNF antibody  
 76 followed by anti-rabbit IgG (FITC, green) and co-labelled with a mouse anti-DDX4/MVH antibody  
 77 followed by anti-mouse IgG (TRITC, red). At least five sections of each age were stained and  
 78 examined. Small follicles (diameter <math>100 \mu\text{m}</math>) were captured and relative fluorescence intensities

79 were quantified using Image J. **b** Representative BDNF and DDX4/AMH staining of small follicles  
80 from a 35-year-old young and a 61-year-old aged females in **(a)**. The outlines of follicles were  
81 marked using dotted white circles. Scale bars, 100  $\mu$ m. **c** Activation of ERK signaling pathways in  
82 human ovary. Ovarian tissues from pre-menopausal women (within 1 hour after the surgery) were  
83 treated with 1 nM BDNF, 3 nM normal IgG or 3 nM Ab4B19 for 35 minutes. Phosphorylated and  
84 total Erk were measured by Western blotting with GAPDH used as a loading control. **d** The ratios  
85 of phosphorylated/total proteins were calculated and plotted after BDNF or Ab4B19 treatment. N =  
86 4 tissues per group. Data are all presented as mean  $\pm$  SEM. Statistical analyses were carried out  
87 using one-way ANOVA followed by the Dunnett's multiple comparisons test **(a)**, or two-tailed  
88 student's t-test **(d)**, respectively (\*P < 0.05; \*\*P < 0.01; \*\*\*P < 0.001). Source data are provided as  
89 a Source Data file.  
90



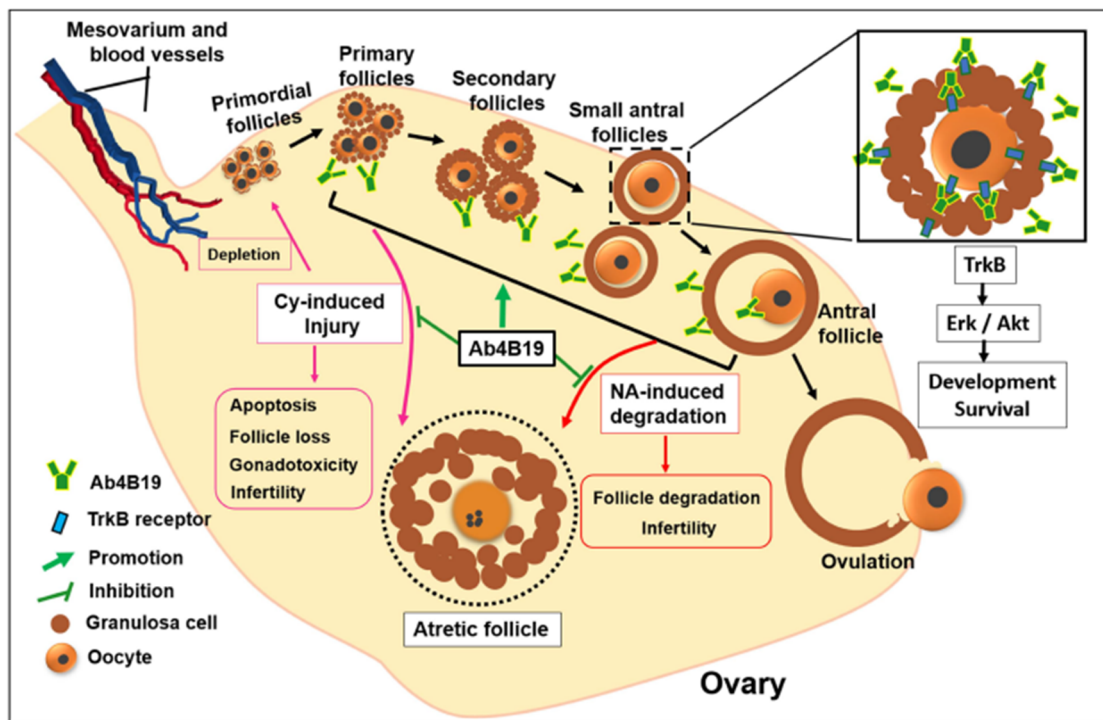

92  
93

94 **Supplementary Fig. 7 Schematic diagram showing the proposed therapeutic effects**  
 95 **of Ab4B19 on folliculogenesis in NA- and Cy-induced POF models.** NA- and Cy-  
 96 induced POF models were used to assess the therapeutic potential of the TrkB antibody  
 97 Ab4B19. Through tail vein injection, Ab4B19 flowed into the ovary and penetrated into  
 98 the ovarian follicles. There, it maintained/promoted follicle development via activation of  
 99 TrkB signaling. In NA-POF model, treatment with Ab4B19 rescued follicle degradation  
 100 and infertility. Similarly, In Cy-POF model, Ab4B19 reversed ovarian follicle loss,  
 101 repaired gonadotoxicity, and restored infertility.

102 **Supplementary Table 1.** Summary of fertility parameters for first-generation mice from  
103 NA-POF mice treated with or without Ab4B19.

| Items                                                                        | NA-POF          | NA-POF+Ab4B19   | <i>P</i> |
|------------------------------------------------------------------------------|-----------------|-----------------|----------|
| Fertility index #<br>(fraction of females<br>that delivered offspring/total) | 4/4(100%)       | 6/6(100%)       | —        |
| Estrous cycles*                                                              | normal          | normal          | —        |
| Number of pups*                                                              | 9.250 ± 0.4787  | 9.667 ± 0.5578  | 0.2933   |
| Mean body weight of pups (g) *                                               | 1.276 ± 0.01713 | 1.292 ± 0.01911 | 0.2809   |

104 In this and all other tables, data represent the mean ± SEM. #Statistical analysis was  
105 performed using Chi-square test. \*Statistical analyses were performed by two-tailed  
106 Student's *t*-test. Source data are provided as a Source Data file.  
107

108 **Supplementary Table 2.** Health status of first-generation mice derived from the NA-POF  
 109 mice treated with or without Ab4B19.

| Items                          | Aging mice      | Aging mice+Ab4B19 | <i>P</i> |
|--------------------------------|-----------------|-------------------|----------|
| TC, mM, (female)               | 1.660 ± 0.06633 | 1.707 ± 0.1474    | 0.3906   |
| TC, mM, (male)                 | 2.318 ± 0.03774 | 2.216 ± 0.1050    | 0.2012   |
| LDL, mM, (female)              | 0.215 ± 0.02363 | 0.175 ± 0.0117    | 0.0858   |
| LDL, mM, (male)                | 0.304 ± 0.00927 | 0.306 ± 0.0320    | 0.4773   |
| HDL, mM, (female)              | 1.577 ± 0.07107 | 1.570 ± 0.1346    | 0.4831   |
| HDL, mM, (male)                | 1.836 ± 0.07215 | 1.800 ± 0.05621   | 0.3524   |
| TG, mM, (female)               | 0.200 ± 0.02683 | 0.290 ± 0.06356   | 0.1175   |
| TG, mM, (male)                 | 0.584 ± 0.07652 | 0.746 ± 0.1677    | 0.2078   |
| GLU, mM, (female)              | 4.505 ± 0.5485  | 4.207 ± 0.5082    | 0.3492   |
| GLU, mM, (male)                | 15.42 ± 0.4956  | 15.22 ± 0.4310    | 0.3854   |
| FSH, ng/ml, (female)           | 8.476 ± 1.211   | 7.907 ± 1.174     | 0.3714   |
| LH, ng/ml, (female)            | 1.830 ± 0.2537  | 1.753 ± 0.1168    | 0.3949   |
| Ovary morphology <sup>^</sup>  | normal          | normal            | —        |
| Testis morphology <sup>^</sup> | normal          | normal            | —        |
| Liver morphology <sup>^</sup>  | normal          | normal            | —        |

110 TC, total cholesterol; LDL-C, low density lipoprotein cholesterol; HDL-C, high density  
 111 lipoprotein cholesterol; TG, triglyceride; GLU, glucose; FSH, follicle-stimulating hormone;  
 112 LH, luteinizing hormone. <sup>^</sup>Morphology analysis was performed by histological assessment  
 113 of H&E staining. Statistical analyses were performed by two-tailed Student's *t*-test. Source  
 114 data are provided as a Source Data file.

115

116 **Supplementary Table 3.** Summary of fertility parameters for the second-generation mice  
117 derived from the NA-POF mice treated with or without Ab4B19.

| Items                                                                        | Aging mice      | Aging mice+Ab4B19 | <i>P</i> |
|------------------------------------------------------------------------------|-----------------|-------------------|----------|
| Fertility index #<br>(fraction of females<br>that delivered offspring/total) | 6/6(100%)       | 6/6(100%)         | —        |
| Estrous cycles*                                                              | normal          | normal            | —        |
| Number of pups*                                                              | 9.500 ± 0.5627  | 9.333 ± 0.4216    | 0.4089   |
| Mean body weight of pups (g) *                                               | 1.262 ± 0.01778 | 1.296 ± 0.01787   | 0.1034   |

118 Statistical analyses were performed by two-tailed Student's *t*-test. Source data are  
119 provided as a Source Data file.

120

121 **Supplementary Table 4.** Health status of the second-generation mice derived from the  
 122 NA-POF mice treated with or without Ab4B19.

| Items                          | Aging mice      | Aging mice+Ab4B19 | <i>P</i> |
|--------------------------------|-----------------|-------------------|----------|
| TC, mM, (female)               | 2.233 ± 0.3867  | 2.235 ± 0.2653    | 0.4986   |
| LDL, mM, (female)              | 0.2050 ± 0.0211 | 0.1783 ± 0.008724 | 0.1414   |
| HDL, mM, (female)              | 1.948 ± 0.2937  | 1.947 ± 0.1981    | 0.4982   |
| TG, mM, (female)               | 0.4083 ± 0.083  | 0.4017 ± 0.09728  | 0.4797   |
| GLU, mM, (female)              | 5.347 ± 1.343   | 5.470 ± 1.036     | 0.4718   |
| Ovary morphology <sup>^</sup>  | normal          | normal            | —        |
| Testis morphology <sup>^</sup> | normal          | normal            | —        |
| Liver morphology <sup>^</sup>  | normal          | normal            | —        |

123 TC, total cholesterol; LDL-C, low density lipoprotein cholesterol; HDL-C, high density  
 124 lipoprotein cholesterol; TG, triglyceride; GLU, glucose; FSH, follicle-stimulating  
 125 hormone; LH, luteinizing hormone. <sup>^</sup>Morphology analysis was performed by histological  
 126 assessment of H&E staining. Statistical analyses were performed by two-tailed Student's  
 127 *t*-test. Source data are provided as a Source Data file.

128

129 **Supplementary Table 5.** Health status of NA-POF mice treated with or without Ab4B19.

| Items                         | Aging mice       | Aging mice+Ab4B19 | <i>P</i> |
|-------------------------------|------------------|-------------------|----------|
| TC, mM, (female)              | 2.267 ± 0.1775   | 2.153 ± 0.1443    | 0.6607   |
| LDL, mM, (female)             | 0.1983 ± 0.01138 | 0.1833 ± 0.008819 | 0.5898   |
| HDL, mM, (female)             | 1.098 ± 0.05935  | 1.170 ± 0.07979   | 0.5317   |
| TG, mM, (female)              | 0.4883 ± 0.05029 | 0.4617 ± 0.04324  | 0.7481   |
| GLU, mM, (female)             | 6.970 ± 0.6099   | 7.102 ± 0.5925    | 0.9509   |
| Liver morphology <sup>^</sup> | normal           | normal            | —        |

130 TC, total cholesterol; LDL-C, low density lipoprotein cholesterol; HDL-C, high density  
 131 lipoprotein cholesterol; TG, triglyceride; GLU, glucose; FSH, follicle-stimulating  
 132 hormone; LH, luteinizing hormone. <sup>^</sup>Morphology analysis was performed by histological  
 133 assessment of H&E staining. Statistical analyses were performed by two-tailed Student's  
 134 *t*-test. Source data are provided as a Source Data file.

135

136 **Supplementary Table 6.** Analysis of fertility parameters for the first-round mating from  
137 Cy-POF mice treated with or without Ab4B19.

| Items                                                                                   | Ctrl           | Vehicle         | Ab4B19          |
|-----------------------------------------------------------------------------------------|----------------|-----------------|-----------------|
| Mating index                                                                            | 6/6(100%)      | 6/6(100%)       | 6/6(100%)       |
| Fertility index <sup>#</sup><br>(fraction of females that delivered<br>offspring/total) | 6/6(100%)      | 6/6(100%)       | 6/6(100%)       |
| Mean body weight of pups (g) <sup>*</sup>                                               | 1.317± 0.01334 | 1.283 ± 0.02999 | 1.305 ± 0.03360 |

138 <sup>\*</sup>Statistical analyses were performed by one-way ANOVA followed by Tukey's multiple-  
139 comparison tests. Source data are provided as a Source Data file.

140

141
